# Supplementary material for: Sulfur Amino Acid Metabolism and the Role of Endogenous Cystathionine-γ-lyase/H2S in Holstein Cows with Clinical Mastitis
Source: MDPI journal article supplement (doi:10.3390/ani12111451), 2022-06-04
Supplement: s1 [file s1]

Supplementary Materials:

Table S1: The 3,739 DEPs generated from the DIA proteomics sequence database.

Table S2: qRT-qPCR primer sequences.

Table S3: The 1,205 candidate DEPs related to sulfur metabolism identified from 988 GO terms.

Table S4: The 220 candidate DEPs related to sulfur metabolism identified from 67 pathways.
