# Supplementary material for: Sulfur Amino Acid Metabolism and the Role of Endogenous Cystathionine-γ-lyase/H2S in Holstein Cows with Clinical Mastitis
Source: MDPI journal article supplement (doi:10.3390/ani12111451), 2022-06-04
Supplement: s1 [file s1]

**Table S2.** RT-qPCR primer sequences.

| Primer name                    | Accession NO.  | Sequence 5'-3'                                             | Product Length |
|--------------------------------|----------------|------------------------------------------------------------|----------------|
| <i>GAPDH</i>                   | NM_001034034.2 | F: GGTCACCAGGGCTGCTTT<br>R: CTGTGCCGTTGAACTTGC             | 128 bp         |
| <i>CBS</i>                     | NM_001102000.2 | F: CCGGAGAAGATGAGCACAGA<br>R: ATGTCATAGTGAGCGAGGGG         | 197 bp         |
| <i>CTH</i>                     | NM_001024567.1 | F: AGGGCTCTCTTCAACATGCT<br>R: AAGCCCACTGAGAGTCGAAT         | 184 bp         |
| <i>IL-1<math>\beta</math></i>  | NM_174093.1    | F: TCAATAAAGTGCAAACCTCCAGGACA<br>R: CTTGCACAAAGCTCATGCAGAA | 133 bp         |
| <i>IL-6</i>                    | NM_173923.2    | F: CCTTCACTCCATTGCTGTCT<br>R: TCCTGATTTCCTCATACTCG         | 391 bp         |
| <i>IL-8</i>                    | NM_173925.2    | F: GCTGGCTGTTGCTCTCTTG<br>R: GGGTGGAAAGGTGTGGAATG          | 126 bp         |
| <i>TNF-<math>\alpha</math></i> | NM_173966.3    | F: AAGCCTCAAGTAACAAGCCGGTAG<br>R: TCACACCGTTGGCCATGAG      | 108 bp         |
| <i>TLR4</i>                    | NM_174198.6    | F: CATCATCTTCATCGTCCTG<br>R: ATCTGCTGTTCTTCTTG             | 190 bp         |
